# Supplementary material for: Micellisation Mechanism and Behaviour of Soluplus®–Furosemide Micelles: Preformulation Studies of an Oral Nanocarrier-Based System
Source: PubMed Central journal article supplement (PMC6469188; doi:10.3390/ph12010015), 2019-01-19
Supplement: pharmaceuticals-12-00015-s001.pdf [file pharmaceuticals-12-00015-s001.pdf]

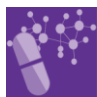

## Supplementary Material: Micellisation Mechanism and Behaviour of Soluplus®-Furosemide Micelles: Preformulation Studies of an Oral Nano-Carrier Based System

Julia F. Alopaeus, Ellen Hagesæther and Ingunn Tho

Table S1. Amount of furosemide (FM) solubilised with increasing Soluplus® concentrations determined after stirring for 96h at room temperature (n=3)

| Conc. of Soluplus<br>(% w/w) | Solubilised FM (mg/mL) |              |               |
|------------------------------|------------------------|--------------|---------------|
|                              | Milli-Q water          | PBS pH 7.4   | 0.1 M HCl     |
| 0                            | 0.01 ± 0.02            | 1.58 ± 0.42  | 0.003 ± 0.001 |
| 0.5                          | 0.10 ± 0.15            | 1.71 ± 0.08  | 0.31 ± 0.05   |
| 2                            | 0.81 ± 0.33            | 3.40 ± 0.82  | 1.21 ± 0.02   |
| 5                            | 3.48 ± 0.17            | 6.47 ± 0.48  | 2.01 ± 0.10   |
| 7                            | x                      | 7.61 ± 1.46  | 2.96 ± 0.54   |
| 10                           | 5.75 ± 0.25            | 8.49 ± 1.18  | 3.26 ± 0.02   |
| 15                           | 6.41 ± 0.31            | 9.76 ± 1.59  | 4.22 ± 0.44   |
| 17                           | 8.55 ± 1.30            | 13.36 ± 1.36 | 5.88 ± 0.62   |
